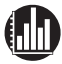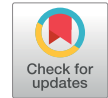

# Plasma Amino Acids and Incident Type 2 Diabetes in Patients With Coronary Artery Disease

*Diabetes Care* 2019;42:1225–1233 | <https://doi.org/10.2337/dc18-2217>

Adrian McCann,<sup>1</sup> Lasse Melvaer Giil,<sup>2,3</sup>  
Arve Ulvik,<sup>1</sup> Reinhard Seifert,<sup>2,4</sup>  
Eirik Wilberg Rebnord,<sup>2,4</sup>  
Eva Ringdal Pedersen,<sup>2</sup>  
Gard Frodahl Tveitevåg Svingen,<sup>2</sup>  
Klaus Meyer,<sup>1</sup> Elin Strand,<sup>2</sup> Simon Dankel,<sup>5</sup>  
Per Magne Ueland,<sup>1,6</sup> and  
Ottar Kjell Nygård<sup>2,4,7</sup>

## OBJECTIVE

Altered plasma amino acid levels have been implicated as markers of risk for incident type 2 diabetes; however, amino acids are also related to established diabetes risk factors. Therefore, potential for confounding and the impact from competing risks require evaluation.

## RESEARCH DESIGN AND METHODS

We prospectively followed 2,519 individuals with coronary artery disease but without diabetes. Mixed Gaussian modeling identified potential for confounding. Confounding, defined as a change in effect estimate ( $\geq 10\%$ ), was investigated by comparing amino acid–incident diabetes risk in a Cox model containing age and sex with that in models adjusted for potential confounders (BMI, estimated glomerular filtration rate, HDL cholesterol, triacylglycerol, C-reactive protein), which were further adjusted for plasma glucose, competing risks, and multiple comparisons (false discovery rate = 0.05, Benjamini-Hochberg method). Finally, component-wise likelihood-based boosting analysis including amino acids and confounders was performed and adjusted for competing risks in order to identify an optimal submodel for predicting incident diabetes.

## RESULTS

The mean age of the source population was 61.9 years; 72% were men. During a median follow-up of 10.3 years, 267 incident cases of diabetes were identified. In age- and sex-adjusted models, several amino acids, including the branched-chain amino acids, significantly predicted incident diabetes. Adjustment for confounders, however, attenuated associations. Further adjustment for glucose and multiple comparisons rendered only arginine significant (hazard ratio/1 SD 1.21 [95% CI 1.07–1.37]). The optimal submodel included arginine and asparagine.

## CONCLUSIONS

Adjustment for relevant clinical factors attenuated the amino acid–incident diabetes risk. Although these findings do not preclude the potential pathogenic role of other amino acids, they suggest that plasma arginine is independently associated with incident diabetes. Both arginine and asparagine were identified in an optimal model for predicting new-onset type 2 diabetes.

Identifying early metabolic alterations remains paramount in efforts to understand better the pathophysiology of type 2 diabetes and to develop preventive strategies (1). Type 2 diabetes is characterized by impaired insulin-mediated glucose homeostasis and compromised pancreatic insulin secretion capacity (2). Research investigating the

<sup>1</sup>Bevital AS, Laboratoriebygget, Bergen, Norway

<sup>2</sup>Department of Clinical Science, University of Bergen, Bergen, Norway

<sup>3</sup>Department of Internal Medicine, Haraldsplass Deaconess Hospital, Bergen, Norway

<sup>4</sup>Department of Heart Disease, Haukeland University Hospital, Bergen, Norway

<sup>5</sup>Mohn Nutrition Research Laboratory, Department of Clinical Science, University of Bergen, Bergen, Norway

<sup>6</sup>Laboratory Medicine and Pathology, Haukeland University Hospital, Bergen, Norway

<sup>7</sup>KG Jebsen Centre for Diabetes Research, University of Bergen, Bergen, Norway

Corresponding author: Adrian McCann, [adrian.mccann@bevital.no](mailto:adrian.mccann@bevital.no)

Received 24 October 2018 and accepted 1 April 2019

This article contains Supplementary Data online at <http://care.diabetesjournals.org/lookup/suppl/doi:10.2337/dc18-2217/-/DC1>.

© 2019 by the American Diabetes Association. Readers may use this article as long as the work is properly cited, the use is educational and not for profit, and the work is not altered. More information is available at <http://www.diabetesjournals.org/content/license>.

etiology of type 2 diabetes has increasingly focused on the interaction between impaired glucose homeostasis, insulin resistance, lipid metabolism, and obesity (2–4). These factors are thought to induce the metabolic dysfunction reflected by abnormal circulating levels of glucose, lipids, proteins, and other classes of metabolites, including amino acids (5).

Metabolomics-based studies have proliferated in the past decade in an attempt to gain insight into the underlying pathophysiology of type 2 diabetes (6). Numerous studies using both targeted and untargeted approaches have reported alterations in circulating amino acid levels in patients with prevalent and incident diabetes. Studies suggest that elevated levels of branched-chain amino acids (BCAAs) (isoleucine, leucine, and valine), and to a lesser extent aromatic amino acids (AAAs) (phenylalanine and tyrosine), are associated with obesity and insulin resistance, as well as established and incident diabetes (6–11). Alanine (Ala), proline (Pro), glutamate (Glu), and aspartate (Asp) have also been positively associated with type 2 diabetes, whereas glycine (Gly), glutamine (Gln), and asparagine (Asn) seem to be inversely related to the disease (8,12).

Despite abundant research linking alterations in circulating amino acid levels to various obesity-related mechanisms and diabetes (10,11,13–18), their potential as independent biomarkers reflecting the etiology and pathogenesis of type 2 diabetes is yet to be fully realized. The inherent challenge of evaluating amino acids as independent risk markers can be explained in part by the interrelatedness of plasma amino acids and their association with several well-established risk factors, including elevated plasma glucose, dyslipidemia, and obesity. Such associations suggest that the relation between plasma amino acids (independent variable) and incident diabetes (outcome) is likely to be affected by confounders, defined simply as variables associated with both the independent variable and the outcome (19). Failure to adjust appropriately for confounders means the crude independent variable–outcome association will be a biased estimate of the true association (20).

Throughout the literature on amino acids and incident type 2 diabetes, however, lipid parameters are not consistently included as covariates (17,21).

Studies also tend to focus on fasting cohorts only (17,21,22), despite limited evidence to do so. Several established diabetes risk markers, including lipids, BMI, and insulin sensitivity, have been shown to be correlated with plasma amino acid levels (23), fulfilling the definition of a potential confounder. Yet, their role as actual confounders is rarely evaluated. Finally, as several risk factors for mortality are also risk factors for type 2 diabetes, bias may occur from the competing risk of death in longitudinal studies.

We aimed to investigate amino acids as independent risk factors with various adjustments for potential confounders, assess whether the competing risk of death is a source of bias, and use a model-selection approach to identify the best-fitting model.

## RESEARCH DESIGN AND METHODS

### Study Population

As described in detail elsewhere (24), the source population for this study included 4,164 adults who underwent elective coronary angiography at two Norwegian university hospitals between 2000 and 2004 (clinical trial reg. no. NCT00354081, clinicaltrials.gov/). Collection of demographic, clinical, and biochemical characteristics at baseline has been described previously (24). Participants were diagnosed with coronary artery disease (CAD) if coronary angiography revealed at least one significant stenosis (defined as  $\geq 50\%$  luminal narrowing in the main coronary arteries or major side branches). Venous blood samples were obtained during a clinical examination before or immediately after coronary angiography. The study fulfilled the principles of the Declaration of Helsinki and was approved by the regional Committee for Medical and Health Research Ethics (approval no. 2010/1880) and the Norwegian Data Protection Authority. All participants provided written informed consent.

From the source cohort of 4,164 adults, 496 individuals with medication-confirmed or a self-reported diagnosis of diabetes at baseline were excluded from these prospective analyses. In addition, 42 individuals with missing HbA<sub>1c</sub> records and 1,107 individuals with HbA<sub>1c</sub>  $\geq 6.5\%$  ( $\geq 48$  mmol/mol), fasting plasma glucose (FPG)  $\geq 7.0$  mmol/L, or non-FPG  $\geq 11.1$  mmol/L were also excluded because of the possible presence of prediabetes or undiagnosed type 2 diabetes. Thus, 2,519

individuals were deemed eligible for the prospective follow-up analyses.

### Identification of Subjects With Incident Type 2 Diabetes

Information on incident diabetes was collected until 31 December 2014. The majority of new cases of type 2 diabetes were identified through linkage to the Norwegian Prescription Database ([www.norpd.no](http://www.norpd.no)), a national registry containing data on all drugs dispensed at outpatient pharmacies in Norway. Participants were classified as having incident type 2 diabetes upon receiving their first prescription for an oral glucose-lowering drug or insulin (Anatomical Therapeutic Chemical Classification System code A10). Incident diabetes was also identified according to ICD-10 codes (specifically codes E11–E14; [www.who.int/classifications/icd/en/](http://www.who.int/classifications/icd/en/)) on participants' discharge summaries after admission to a Norwegian hospital. Hospital data were obtained from the Cardiovascular Disease in Norway (CVDNOR) project (<https://cvdnor.w.uib.no>) (25). We also obtained from self-reports additional information identifying cases of new-onset type 2 diabetes, which we verified using plasma glucose measurements during in-trial follow-up of the original source cohort (2000–2005) (24). The median (interquartile range [IQR]) follow-up time from blood sampling to incident diabetes diagnosis was 10.3 years (9.1–11.6).

### Biochemical Analyses

Participants who reported no intake of food or beverages during the 6 h before sampling were considered to be fasting. All plasma and serum samples were stored at  $-80^{\circ}\text{C}$  until analyses were performed at Bevitallaboratory ([www.bevital.no](http://www.bevital.no)). Plasma concentrations of all amino acids were measured by using gas chromatography–tandem mass spectrometry (26), with the exception of arginine (Arg), which was analyzed by using liquid chromatography–tandem mass spectrometry (27). The lower limits of detection and coefficients of variability have been reported elsewhere (26,27). Estimated glomerular filtration rate (eGFR), HbA<sub>1c</sub>, serum lipoproteins, and C-reactive protein (CRP) were calculated or measured as previously described (28). We used the updated HOMA-2 to estimate both insulin resistance and  $\beta$ -cell function based on

**Table 1—Baseline characteristics of the study population according to diabetes status at baseline and follow-up**

| Variable                                            | Type 2 diabetes or prediabetes at baseline<br>(confirmed or suspected) |                            | Type 2 diabetes at follow-up* |                            | P      |
|-----------------------------------------------------|------------------------------------------------------------------------|----------------------------|-------------------------------|----------------------------|--------|
|                                                     | No (n = 2,519)                                                         | Yes (n = 1,645)            | No (n = 2,252)                | Yes (n = 267)              |        |
| Age (years)                                         | 61.3 (10.4)                                                            | 62.4 (10.3)                | 61.4 (10.5)                   | 60.3 (9.9)                 | 0.08   |
| Male sex, n (%)                                     | 1,841 (73.1)                                                           | 1,147 (70.1)               | 1,630 (72.5)                  | 210 (78.7)                 | 0.03   |
| Fasting, n (%)                                      | 642 (25.5)                                                             | 493 (30.1)                 | 582 (25.9)                    | 59 (22.1)                  | 0.22   |
| Calorie intake/day (kcal)                           | 2,024 (1,631–2,482)                                                    | 2,059 (1,637–2,481)        | 2,023 (1,632–2,496)           | 2,062 (1,614–2,458)        | 0.74   |
| Protein intake (%)                                  | 16.6 (15.1–18.3)                                                       | 16.6 (15.1–18.4)           | 16.6 (15.1–18.3)              | 16.6 (15.1–18.4)           | 0.55   |
| BMI (kg/m <sup>2</sup> )                            | 26.3 (3.6)                                                             | 27.4 (4.4)                 | 26.1 (3.5)                    | 28.7 (3.8)                 | <0.001 |
| Current smoker, n (%)                               | 581 (23.1)                                                             | 390 (23.9)                 | 522 (23.2)                    | 58 (21.7)                  | 0.58   |
| Hypertension (mmHg), n (%)                          | 1,115 (44.3)                                                           | 827 (50.6)                 | 965 (42.9)                    | 148 (55.4)                 | <0.001 |
| Systolic BP                                         | 139 (125–152)                                                          | 140 (129–157)              | 139 (125–152)                 | 140 (128–154)              | 0.11   |
| Diastolic BP                                        | 80 (75–88)                                                             | 80 (75–89)                 | 80 (75–88)                    | 83 (76–90)                 | 0.001  |
| Significant CAD†, n (%)                             | 1,890 (75.0)                                                           | 1,227 (75.0)               | 1,669 (74.2)                  | 219 (82.0)                 | 0.005  |
| Renal function and inflammation                     |                                                                        |                            |                               |                            |        |
| Serum creatinine (μmol/L)                           | 89 (81–98)                                                             | 89 (80–99)                 | 89 (81–98)                    | 89 (82–99)                 | 0.95   |
| GFR (mL · min <sup>−1</sup> · 1.73 m <sup>2</sup> ) | 91 (79–99)                                                             | 90 (76–99)                 | 91 (79–99)                    | 91 (80–100)                | 0.17   |
| Serum CRP (mg/L)                                    | 1.7 (0.8–3.4)                                                          | 1.9 (0.9–4.0)              | 1.7 (0.8–3.3)                 | 2.2 (1.1–4.2)              | 0.41   |
| Serum lipids                                        |                                                                        |                            |                               |                            |        |
| ApoA1 (g/L)                                         | 1.31 (1.14–1.48)                                                       | 1.28 (1.11–1.47)           | 1.31 (1.15–1.49)              | 1.24 (1.11–1.40)           | <0.001 |
| ApoB (g/L)                                          | 0.87 (0.73–1.05)                                                       | 0.85 (0.73–1.03)           | 0.87 (0.73–1.04)              | 0.90 (0.76–1.08)           | 0.03   |
| HDL (mmol/L)                                        | 1.26 (1.02–1.50)                                                       | 1.20 (1.00–1.50)           | 1.30 (1.10–1.50)              | 1.10 (1.00–1.30)           | <0.001 |
| LDL (mmol/L)                                        | 3.0 (1.6–4.4)                                                          | 3.0 (1.7–4.3)              | 3.0 (2.4–3.8)                 | 3.0 (2.4–3.6)              | 0.81   |
| TAG (mmol/L)                                        | 1.44 (1.06–2.03)                                                       | 1.59 (1.13–2.34)           | 1.40 (1.03–1.95)              | 1.80 (1.30–2.65)           | <0.001 |
| Glucose homeostasis                                 |                                                                        |                            |                               |                            |        |
| Plasma glucose (mmol/L)                             | 5.4 (5.0–6.1)                                                          | 6.1 (5.3–8.4)              | 5.4 (4.9–5.9)                 | 6.2 (5.6–7.4)              | <0.001 |
| HbA <sub>1c</sub> (%) [mmol/mol]                    | 5.6 (5.0–6.0) [38 (31–42)]                                             | 7.1 (6.7–7.8) [54 (50–62)] | 5.6 (5.0–6.0) [38 (31–42)]    | 5.7 (5.0–6.1) [39 (31–43)] | 0.22   |
| Serum insulin (pmol/L)                              | 21.8 (19.7–55.0)                                                       | 36.3 (19.7–88.2)           | 21.8 (19.7–54.0)              | 39.4 (19.7–105.0)          | 0.01   |
| Serum C-peptide (pmol/L)                            | 0.71 (0.53–0.98)                                                       | 0.82 (0.60–1.16)           | 0.70 (0.51–0.96)              | 0.90 (0.66–1.17)           | 0.001  |
| HOMA-2 C-peptide†                                   |                                                                        |                            |                               |                            |        |
| β-Cell activity                                     | 112 (93–138)                                                           | 104 (70–135)               | 112 (92–138)                  | 118 (97–142)               | 0.77   |
| Insulin resistance                                  | 1.6 (1.2–2.2)                                                          | 1.9 (1.4–2.8)              | 1.6 (1.1–2.2)                 | 2.0 (1.5–2.7)              | <0.001 |
| Medication, n (%)                                   |                                                                        |                            |                               |                            |        |
| Aspirin                                             | 2,084 (82.7)                                                           | 1,309 (80.0)               | 1,846 (82.1)                  | 236 (88.4)                 | 0.01   |
| Statins                                             | 2,020 (80.2)                                                           | 1,311 (80.1)               | 1,791 (79.6)                  | 227 (85.0)                 | 0.04   |
| β-Blockers                                          | 1,830 (72.6)                                                           | 1,182 (72.2)               | 1,618 (71.9)                  | 210 (78.7)                 | 0.02   |
| Loop diuretics                                      | 231 (9.2)                                                              | 220 (13.4)                 | 195 (8.7)                     | 36 (13.5)                  | 0.01   |
| ACE inhibitors                                      | 475 (18.9)                                                             | 383 (23.4)                 | 403 (17.9)                    | 71 (26.6)                  | 0.001  |
| Plasma amino acids (μmol/L)                         |                                                                        |                            |                               |                            |        |
| Glycine                                             | 214 (186–251)                                                          | 202 (174–241)              | 216 (188–254)                 | 199 (176–226)              | <0.001 |
| Serine                                              | 104 (91–118)                                                           | 102 (89–117)               | 104 (91–119)                  | 102 (89–115)               | 0.005  |

Continued on p. 1228

Table 1—Continued

| Variable       | Type 2 diabetes or prediabetes at baseline<br>(confirmed or suspected) |                 |        | Type 2 diabetes at follow-up* |               |        |
|----------------|------------------------------------------------------------------------|-----------------|--------|-------------------------------|---------------|--------|
|                | No (n = 2,519)                                                         | Yes (n = 1,645) | P      | No (n = 2,252)                | Yes (n = 267) | P      |
| Glutamine      | 510 (462–558)                                                          | 492 (440–544)   | <0.001 | 512 (465–560)                 | 489 (437–542) | <0.001 |
| Asparagine     | 50 (44–58)                                                             | 49 (43–56)      | <0.001 | 51 (45–58)                    | 48 (43–55)    | <0.001 |
| Threonine      | 120 (104–138)                                                          | 116 (100–134)   | <0.001 | 120 (104–139)                 | 120 (102–134) | 0.29   |
| Total cysteine | 295 (272–320)                                                          | 297 (274–325)   | 0.11   | 295 (271–319)                 | 301 (278–326) | 0.006  |
| Methionine     | 27 (22–32)                                                             | 26 (22–31)      | 0.14   | 26 (22–32)                    | 28 (23–32)    | 0.05   |
| Proline        | 244 (199–298)                                                          | 241 (192–301)   | 0.59   | 243 (198–297)                 | 251 (204–305) | 0.63   |
| Histidine      | 73 (67–79)                                                             | 71 (65–78)      | <0.001 | 73 (67–79)                    | 73 (66–79)    | 0.65   |
| Ornithine      | 72 (61–84)                                                             | 71 (60–84)      | 0.66   | 72 (61–84)                    | 71 (61–84)    | 0.84   |
| Lysine         | 176 (154–202)                                                          | 176 (154–201)   | 0.63   | 175 (154–201)                 | 182 (157–205) | 0.01   |
| Arginine       | 79 (64–93)                                                             | 77 (63–92)      | 0.009  | 78 (64–93)                    | 83 (67–100)   | 0.005  |
| Tryptophan     | 69 (61–79)                                                             | 69 (59–79)      | 0.11   | 69 (61–78)                    | 73 (65–84)    | <0.001 |
| Glutamic acid  | 71 (47–102)                                                            | 77 (53–106)     | 0.001  | 68 (46–100)                   | 89 (67–118)   | <0.001 |
| Aspartic acid  | 5.8 (4.6–7.5)                                                          | 5.9 (4.7–7.4)   | 0.56   | 5.7 (4.5–7.4)                 | 6.5 (5.1–8.5) | <0.001 |
| Tyrosine       | 68 (58–81)                                                             | 68 (58–82)      | 0.16   | 67 (57–80)                    | 72 (60–87)    | <0.001 |
| Alanine        | 369 (310–431)                                                          | 371 (312–436)   | 0.11   | 368 (306–430)                 | 387 (339–438) | 0.001  |
| Phenylalanine  | 58 (52–66)                                                             | 59 (52–67)      | 0.08   | 58 (52–66)                    | 61 (55–69)    | <0.001 |
| Leucine        | 126 (108–151)                                                          | 132 (112–160)   | <0.001 | 125 (107–148)                 | 141 (117–167) | <0.001 |
| Valine         | 254 (226–290)                                                          | 265 (233–306)   | <0.001 | 252 (224–287)                 | 280 (245–317) | <0.001 |
| Isoleucine     | 68 (57–83)                                                             | 72 (60–89)      | <0.001 | 68 (57–82)                    | 76 (63–92)    | <0.001 |

Data are presented as mean (SD) or median (IQR) unless otherwise indicated. ApoA1, apolipoprotein A1; ApoB, apolipoprotein B; BP, blood pressure. \*Duration of follow-up: median 10.3 years (IQR 9.1–11.6). †At least one stenosis with  $\geq 50\%$  luminal narrowing in a main coronary artery or its major side branches, as identified on coronary angiography. ‡Sample size,  $n = 607$ .

serum C-peptide in a subgroup of fasting participants ( $n = 607$ ) (29).

### A Priori Identification of Potential Confounders

We identified potential confounders linked to plasma amino acid levels in the literature (7–9,11,17,21). The identified confounders were largely established, clinically relevant risk factors for type 2 diabetes (BMI, eGFR, HDL cholesterol, triacylglycerol [TAG], CRP) or surrogate measures of type 2 diabetes (e.g., hyperglycemia, which indicates cellular insulin resistance).

### Statistical Definition of Confounding

For this study, we empirically confirmed potential confounders using the change-in-estimate (CIE) criterion (30). The CIE criterion defines confounders as variables for which the percentage difference between the values of the regression estimate before and after adjustment is equal to or larger than a prespecified value.

### Statistical Analyses

Variables were reported as count (percentage), mean (SD), or median (IQR), as appropriate. Skewed variables were transformed according to the Tukey ladder of powers (square root, ln, 1/square root, and inverse transformations). The aim was to linearize relationships, reduce heteroscedasticity, maintain power, and reduce the type I error rate. Missing amino acid data (all  $<5\%$ ) were determined through mean imputation. We used the R packages mixed Gaussian model and qgraph to visualize the relations between amino acids and potential confounders as weighted adjacencies. The amino acid-associated hazard for incident diabetes was assessed in a crude Cox model (with age and sex), to which potential confounders and then plasma glucose were added. All models included an indicator variable for fasting. Confounding was defined as a 10% CIE. Estimates from Cox regression were compared with estimates from the method described by Fine and Gray (31) in order to assess whether the competing risk of death affected the estimates (32). The  $P$  values were adjusted for multiple comparisons at a false discovery rate (FDR) of 0.05 (Benjamini-Hochberg method). Finally, we applied a variable selection model (CoxBoost package in R) with all amino acids and potential confounders using component-wise likelihood-based

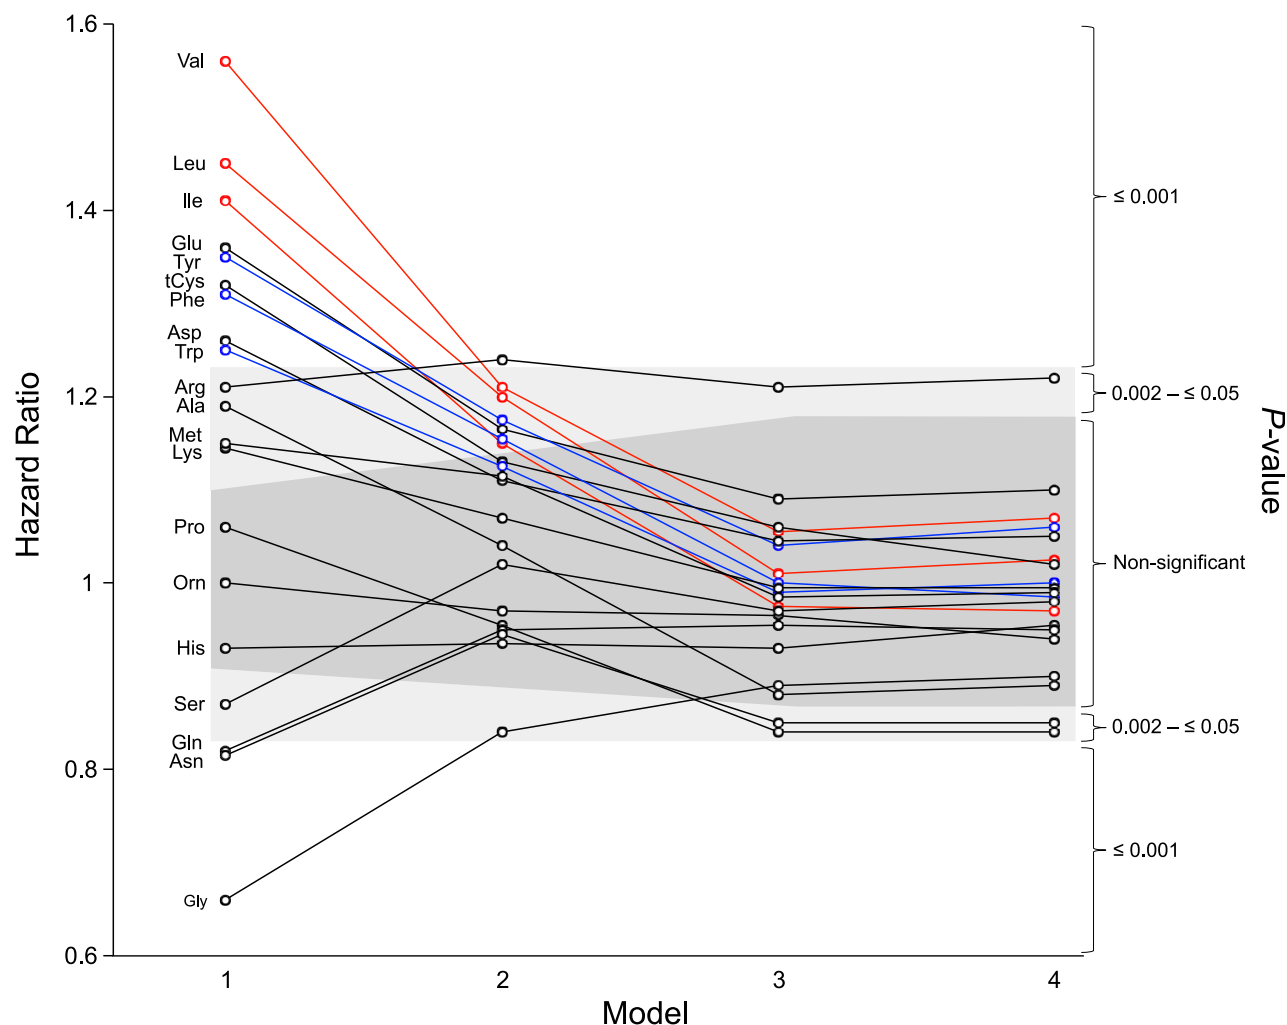

**Figure 1**—Association of baseline plasma amino acid concentrations with incident type 2 diabetes. Observations for 2,519 individuals, 267 of whom had incident diabetes; 464 mortality events occurred. Hazard ratios were obtained by using Cox regression and adjusting for age and sex (model 1); age, sex, eGFR, BMI, HDL cholesterol, TAG, and CRP (model 2); model 2 factors plus plasma glucose (model 3); and model 3 factors plus mortality (model 4). Red circles and lines indicate BCAAs; blue circles and lines indicate AAAs; black circles and lines indicate other amino acids. Ala, alanine; Arg, arginine; Asn, asparagine; Asp, aspartic acid; Gln, glutamine; Glu, glutamic acid; His, histidine; Ile, isoleucine; Leu, leucine; Lys, lysine; Met, methionine; Orn, ornithine; Phe, phenylalanine; Pro, proline; Ser, serine; tCys, total cysteine; Trp, tryptophan; Tyr, tyrosine; Val, valine.

boosting (33), with death as a competing risk. We did not penalize confounders and reestimated the model to check for adjustment from unselected key confounders; we estimated amino acids with penalized partial likelihood. We first identified the optimal penalty, then we identified the optimal number of steps through k-fold cross-validation ( $k = 10$ ). All tests were two-tailed, and the significance level was set to 0.05. Statistical analyses were performed by using STATA version 15 (StataCorp LLC; [www.stata.com](http://www.stata.com)) and R version 3.3.0 for Mac ([www.R-project.org](http://www.R-project.org)).

## RESULTS

### Participants With and Without Type 2 Diabetes at Baseline

Among the source population ( $n = 4,164$ ), 1,645 participants had confirmed or

suspected prediabetes or undiagnosed type 2 diabetes. We refer to them here as the prevalent diabetes group. Compared to participants identified as diabetes-free at baseline, participants in the prevalent diabetes group had higher BMI, lower HDL cholesterol levels, and elevated TAG and plasma glucose levels (Table 1). Participants in the prevalent diabetes group also had a higher prevalence of diagnosed hypertension and used more loop diuretics and ACE inhibitors. The baseline amino acid profile of those in the prevalent diabetes group also differed from the profile of those in the diabetes-free group, including lower plasma concentrations of Gly and Gln and higher concentrations of Glu and the BCAAs (Table 1).

### Diabetes-Free Participants and Incident Diabetes

Of the 2,519 diabetes-free participants at baseline, 1,841 (73.1%) were men; their mean age was 61.3 years (SD 10.4) and mean BMI was 26.3 kg/m<sup>2</sup> (SD 3.6). During a median of 10.3 years of follow-up (IQR 9.1–11.6), a total of 267 cases of incident diabetes (10.6%) were identified. The group with incident diabetes had higher BMI, lower HDL cholesterol levels, and higher TAG and plasma glucose levels at baseline than the group who remained diabetes-free during follow-up (Table 1). They also had a higher prevalence of CAD and hypertension and a higher rate of medication use, including aspirin, statins,  $\beta$ -blockers, loop diuretics, and ACE inhibitors. The amino acid profile of those with incident





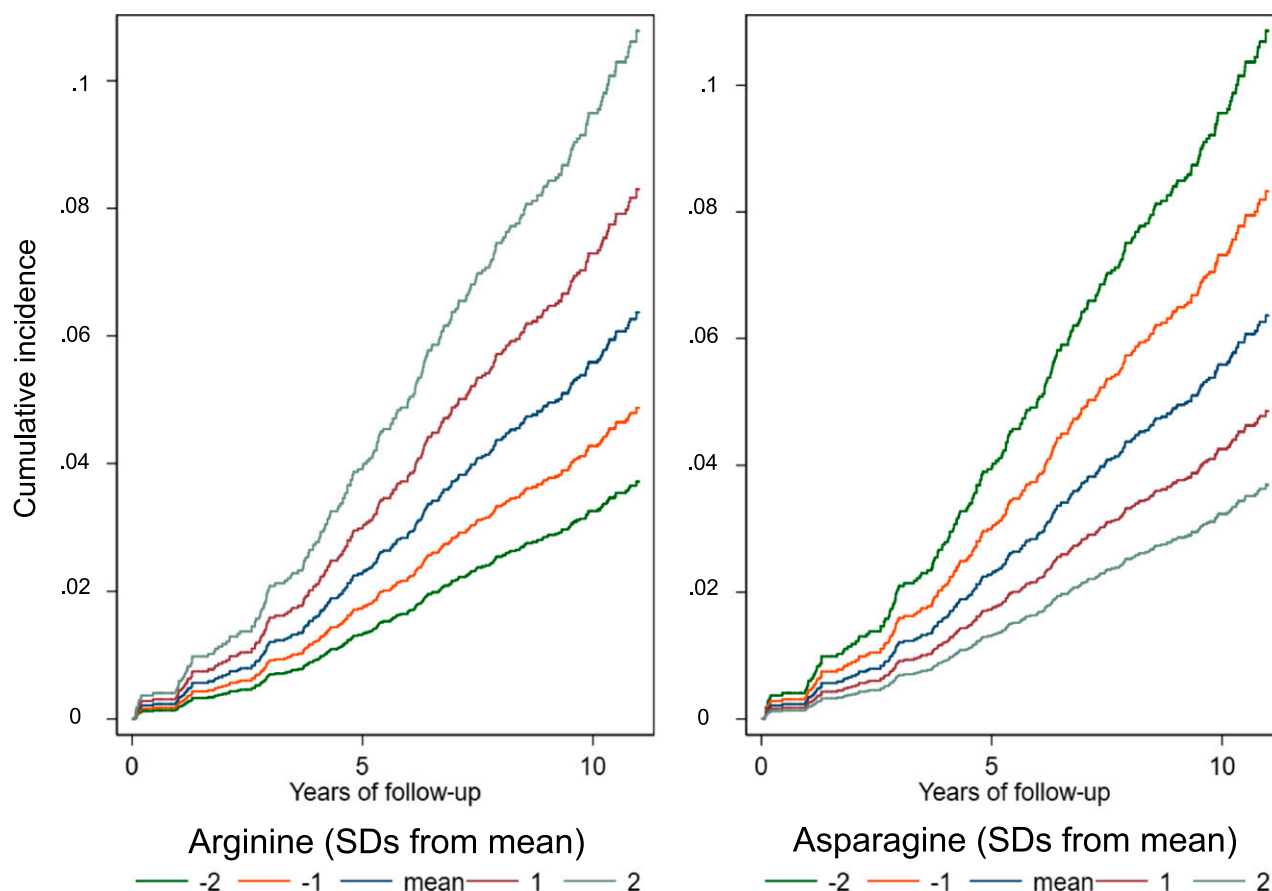

**Figure 2**—Association of plasma Arg (left) and plasma Asn (right) with cumulative incidence of type 2 diabetes. Data represent observations from 2,519 participants. The model included plasma glucose, competing risks, and fasted status.

type 2 diabetes. In vitro experiments suggest a role for Arg in aggregating insulin. Investigation of heat-induced aggregation of protein solutions showed that Arg may have a potentially promoting effect (36), whereas other investigations of bovine insulin suggest an inhibitory role (37). Our finding that Arg was independently related to risk for type 2 diabetes might reflect an effect promoting insulin aggregation. This may support hypotheses linking diabetes development to peptide aggregation and the formation of toxic amyloid fibrils at pancreatic islet  $\beta$ -cells (2,38). However, we did not observe associations between Arg or Asn and serum insulin, C-peptide,  $\beta$ -cell function, or other clinically relevant parameters such as inflammation (CRP). Although the mechanisms linking Arg and Asn to incident diabetes are not clear, our findings suggest that these amino acids could be involved in the early development of type 2 diabetes, independent of established risk factors.

Multivariable regression analyses confirmed that all amino acids except

Arg were subject to confounding by established risk factors. These confounding effects are not surprising, given that risk markers such as BMI and lipids correlate with most plasma amino acids (23). Indeed, it is these associations that probably reduce the potential for amino acids to predict diabetes and may explain why including amino acids has not substantially improved clinical models (8,11,12). The nonstandardized approach to adjusting for potential confounders may undermine the validity and reliability of previous research linking amino acids to diabetes. Although age, sex, and BMI seem to be adjusted for regularly (17,21), adjustment for lipid and glucose parameters is much less consistent (17,21). Acknowledging the extensive interplay between amino acids, established risk factors, and underlying physiological processes, our findings suggest that it is imperative to consistently include confounders when evaluating amino acids as independent predictors of type 2 diabetes. We did not identify an impact of death

as a competing risk. In our opinion, however, this cannot be generalized because of differences between cohorts, particularly with regard to duration of follow-up and mortality rates. As with any observational study, it is also important to acknowledge that causality cannot be inferred from statistical methods alone. Nor do our observations allow for conclusions precluding a possible role of other amino acids such as BCAAs in the pathogenesis type 2 diabetes (39).

This work has a number of strengths, including the large sample size, prospective design, and long follow-up. Data allowing incident type 2 diabetes to be confirmed was collected from national health registries to which reporting is mandatory for all drug prescriptions and hospital admissions in Norway. It is possible, however, that some cases of new-onset type 2 diabetes may have been missed during follow-up. We adopted a data-driven approach to confounders. Further, we applied objective criteria to identify the optimal submodel. Taken together, these steps should significantly

reduce bias, although we cannot rule out influence from residual confounding. Unfortunately, our study design did not allow us to identify individuals who had incident type 1 diabetes; the low prevalence of this condition, however, probably minimizes any potential effect on our results (40). The study participants were all referred to a hospital for elective coronary angiography, and the majority had CAD, limiting the generalizability of our findings. Last, the original source study was not designed to investigate incident diabetes, and samples were obtained from the majority of participants when they were in a nonfasting state.

In conclusion, after adjusted analyses, the associated hazard for type 2 diabetes was severely attenuated for most amino acids, including BCAAs. Only Arg was an independent predictor of future diabetes after adjusting for multiple comparisons, but Arg and Asn were selected for inclusion in an optimal predictive model. Adjusting for established metabolic and clinical risk factors was crucial for reaching a conclusion about the independence of the associations.

**Acknowledgments.** The authors thank all the Western Norway Coronary Angiography Cohort coworkers at Haukeland and Stavanger University Hospitals.

**Funding.** This work was supported by the KG Jebsen Centre for Diabetes Research; the University of Bergen; the Department of Heart Disease, Haukeland University Hospital, Bergen; and the Foundation to Promote Research into Functional Vitamin B12 Deficiency, Bergen, Norway.

**Duality of Interest.** No potential conflicts of interest relevant to this article were reported.

**Author Contributions.** A.M. and L.M.G. performed statistical analysis, interpreted data, and wrote the manuscript. A.M., L.M.G., A.U., R.S., and E.R.P. conducted the research. A.M. and O.K.N. designed the research. A.U., E.W.R., E.R.P., G.F.T.S., K.M., E.S., S.D., P.M.U., and O.K.N. critically revised the manuscript. A.M., L.M.G., A.U., R.S., E.W.R., E.R.P., G.F.T.S., K.M., E.S., S.D., P.M.U., and O.K.N. read and approved the final version of the manuscript. A.M. and O.K.N. are the guarantors of this work and, as such, had full access to all the data in the study and take responsibility for the integrity of the data and the accuracy of the data analysis.

## References

1. Cho NH, Shaw JE, Karuranga S, et al. IDF Diabetes Atlas: global estimates of diabetes prevalence for 2017 and projections for 2045. *Diabetes Res Clin Pract* 2018;138:271–281
2. Kahn SE, Cooper ME, Del Prato S. Pathophysiology and treatment of type 2 diabetes:

perspectives on the past, present, and future. *Lancet* 2014;383:1068–1083

3. Savage DB, Petersen KF, Shulman GI. Disordered lipid metabolism and the pathogenesis of insulin resistance. *Physiol Rev* 2007;87:507–520
4. Kahn SE, Hull RL, Utzschneider KM. Mechanisms linking obesity to insulin resistance and type 2 diabetes. *Nature* 2006;444:840–846
5. Muoio DM, Newgard CB. Mechanisms of disease: molecular and metabolic mechanisms of insulin resistance and beta-cell failure in type 2 diabetes. *Nat Rev Mol Cell Biol* 2008;9:193–205
6. Roberts LD, Koulman A, Griffin JL. Towards metabolic biomarkers of insulin resistance and type 2 diabetes: progress from the metabolome. *Lancet Diabetes Endocrinol* 2014;2:65–75
7. Newgard CB, An J, Bain JR, et al. A branched-chain amino acid-related metabolic signature that differentiates obese and lean humans and contributes to insulin resistance. *Cell Metab* 2009;9:311–326
8. Wang TJ, Larson MG, Vasan RS, et al. Metabolite profiles and the risk of developing diabetes. *Nat Med* 2011;17:448–453
9. Magnusson M, Lewis GD, Ericson U, et al. A diabetes-predictive amino acid score and future cardiovascular disease. *Eur Heart J* 2013;34:1982–1989
10. Wang-Sattler R, Yu Z, Herder C, et al. Novel biomarkers for pre-diabetes identified by metabolomics. *Mol Syst Biol* 2012;8:615
11. Yamakado M, Nagao K, Imaizumi A, et al. Plasma free amino acid profiles predict four-year risk of developing diabetes, metabolic syndrome, dyslipidemia, and hypertension in Japanese population. *Sci Rep* 2015;5:11918
12. Floegel A, Stefan N, Yu Z, et al. Identification of serum metabolites associated with risk of type 2 diabetes using a targeted metabolomic approach. *Diabetes* 2013;62:639–648
13. Martin FP, Montoliu I, Collino S, et al. Topographical body fat distribution links to amino acid and lipid metabolism in healthy obese women [corrected] [published correction appears in *PLoS One* 2013;8]. *PLoS One* 2013;8:e73445
14. Herman MA, She P, Peroni OD, Lynch CJ, Kahn BB. Adipose tissue branched chain amino acid (BCAA) metabolism modulates circulating BCAA levels. *J Biol Chem* 2010;285:11348–11356
15. Lackey DE, Lynch CJ, Olson KC, et al. Regulation of adipose branched-chain amino acid catabolism enzyme expression and cross-adipose amino acid flux in human obesity. *Am J Physiol Endocrinol Metab* 2013;304:E1175–E1187
16. Lerin C, Goldfine AB, Boes T, et al. Defects in muscle branched-chain amino acid oxidation contribute to impaired lipid metabolism. *Mol Metab* 2016;5:926–936
17. Bi X, Henry CJ. Plasma-free amino acid profiles are predictors of cancer and diabetes development. *Nutr Diabetes* 2017;7:e249
18. Newgard CB. Interplay between lipids and branched-chain amino acids in development of insulin resistance. *Cell Metab* 2012;15:606–614
19. Greenland S, Morgenstern H. Confounding in health research. *Annu Rev Public Health* 2001;22:189–212
20. Skelly AC, Dettori JR, Brodt ED. Assessing bias: the importance of considering confounding. *Evid Based Spine Care J* 2012;3:9–12

21. Guasch-Ferré M, Hruby A, Toledo E, et al. Metabolomics in prediabetes and diabetes: a systematic review and meta-analysis. *Diabetes Care* 2016;39:833–846
22. Tzoulaki I, Ebbels TM, Valdes A, Elliott P, Ioannidis JP. Design and analysis of metabolomics studies in epidemiologic research: a primer on -omic technologies. *Am J Epidemiol* 2014;180:129–139
23. Gar C, Rottenkolber M, Pohn C, Adamski J, Seissler J, Lechner A. Serum and plasma amino acids as markers of prediabetes, insulin resistance, and incident diabetes. *Crit Rev Clin Lab Sci* 2018;55:21–32
24. Ebbing M, Bleie Ø, Ueland PM, et al. Mortality and cardiovascular events in patients treated with homocysteine-lowering B vitamins after coronary angiography: a randomized controlled trial. *JAMA* 2008;300:795–804
25. Sulo GJ, Vollset SE, Nygård O, Øyen N, Tell GS. Cardiovascular disease and diabetes mellitus in Norway during 1994–2009 CVDNOR—a nationwide research project. *Nor Epidemiol* 2013;21:101–107
26. Midttun Ø, McCann A, Aarseth O, et al. Combined measurement of 6 fat-soluble vitamins and 26 water-soluble functional vitamin markers and amino acids in 50 µl of serum or plasma by high-throughput mass spectrometry. *Anal Chem* 2016;88:10427–10436
27. Midttun Ø, Kvalheim G, Ueland PM. High-throughput, low-volume, multianalyte quantification of plasma metabolites related to one-carbon metabolism using HPLC-MS/MS. *Anal Bioanal Chem* 2013;405:2009–2017
28. Rebnord EW, Pedersen ER, Strand E, et al. Glycated hemoglobin and long-term prognosis in patients with suspected stable angina pectoris without diabetes mellitus: a prospective cohort study. *Atherosclerosis* 2015;240:115–120
29. Levy JC, Matthews DR, Hermans MP. Correct homeostasis model assessment (HOMA) evaluation uses the computer program. *Diabetes Care* 1998;21:2191–2192
30. McNamee R. Confounding and confounders. *Occup Environ Med* 2003;60:227–234; quiz 164, 234
31. Fine JP, Gray RJ. A proportional hazards model for the subdistribution of a competing risk. *J Am Stat Assoc* 1999;94:496–509
32. Haneuse S, Lee KH. Semi-competing risks data analysis: accounting for death as a competing risk when the outcome of interest is nonterminal. *Circ Cardiovasc Qual Outcomes* 2016;9:322–331
33. Binder H, Allignol A, Schumacher M, Beyersmann J. Boosting for high-dimensional time-to-event data with competing risks. *Bioinformatics* 2009;25:890–896
34. Irving BA, Spielmann G. Does citrulline sit at the nexus of metformin's pleiotropic effects on metabolism and mediate its salutatory effects in individuals with type 2 diabetes? *Diabetes* 2016;65:3537–3540
35. Palmer ND, Stevens RD, Antinozzi PA, et al. Metabolomic profile associated with insulin resistance and conversion to diabetes in the Insulin Resistance Atherosclerosis Study. *J Clin Endocrinol Metab* 2015;100:E463–E468
36. Shah D, Shaikh AR, Peng X, Rajagopalan R. Effects of arginine on heat-induced aggregation of concentrated protein solutions. *Biotechnol Prog* 2011;27:513–520



37. Varughese MM, Newman J. Inhibitory effects of arginine on the aggregation of bovine insulin. *J Biophys* 2012;2012:434289
38. Jurgens CA, Toukatly MN, Fligner CL, et al.  $\beta$ -Cell loss and  $\beta$ -cell apoptosis in human type 2 diabetes are related to islet amyloid deposition. *Am J Pathol* 2011;178:2632–2640
39. Arany Z, Neinast M. Branched chain amino acids in metabolic disease. *Curr Diab Rep* 2018; 18:76
40. Zinman B, Kahn SE, Haffner SM, O'Neill MC, Heise MA, Freed MI; ADOPT Study Group. Phenotypic characteristics of GAD antibody-positive recently diagnosed patients with type 2 diabetes in North America and Europe. *Diabetes* 2004;53:3193–3200
